# Supplementary material for: Degradation of sulfadiazine in aqueous media by peroxymonosulfate activated with biochar-supported ZnFe2O4 in combination with visible light in an internal loop-lift reactor
Source: Royal Society of Chemistry journal article supplement (doi:10.1039/d2ra04573g), 2022-01-01
Supplement: d2ra04573g1.pdf [file d2ra04573g1.pdf]

Table S1 Reaction rate constants and their correlation coefficients under different operating conditions

| No. | ALR | BCR | O <sub>2</sub> | Air | N <sub>2</sub> | UV | ZnFe/BC<br>(g/L) | PMS<br>(mmol/L) | pH <sub>0</sub> | C <sub>0</sub><br>(mg/L) | BC<br>(g/L) | TBA<br>(mol/L) | EtOH<br>(mol/L) | BQ<br>(mol/L) | NaN <sub>3</sub><br>(mol/L) | K <sub>2</sub> Cr <sub>2</sub> O <sub>7</sub><br>(mol/L) | EDTA<br>(mol/L) | <i>k</i><br>(min <sup>-1</sup> ) | r <sup>2</sup> |
|-----|-----|-----|----------------|-----|----------------|----|------------------|-----------------|-----------------|--------------------------|-------------|----------------|-----------------|---------------|-----------------------------|----------------------------------------------------------|-----------------|----------------------------------|----------------|
| 1   | √   |     |                | √   |                | √  |                  | 5               | 6               | 30                       |             |                |                 |               |                             |                                                          |                 | 0.025                            | 0.969          |
| 2   | √   |     |                | √   |                |    |                  | 5               | 6               | 30                       | 0.5         |                |                 |               |                             |                                                          |                 | 0.0051                           | 0.981          |
| 3   | √   |     |                | √   |                |    | 0.5              | 5               | 6               | 30                       |             |                |                 |               |                             |                                                          |                 | 0.018                            | 0.991          |
| 4   | √   |     |                | √   |                | √  | 0.5              | 5               | 6               | 30                       |             |                |                 |               |                             |                                                          |                 | 0.082                            | 0.991          |
| 5   | √   |     |                | √   |                | √  | 0.5              | 1               | 6               | 30                       |             |                |                 |               |                             |                                                          |                 | 0.0061                           | 0.943          |
| 6   | √   |     |                | √   |                | √  | 0.5              | 3               | 6               | 30                       |             |                |                 |               |                             |                                                          |                 | 0.036                            | 0.998          |
| 7   | √   |     |                | √   |                | √  | 0.5              | 5               | 6               | 30                       |             |                |                 |               |                             |                                                          |                 | 0.082                            | 0.991          |
| 8   | √   |     |                | √   |                | √  | 0.5              | 7               | 6               | 30                       |             |                |                 |               |                             |                                                          |                 | 0.083                            | 0.982          |
| 9   | √   |     |                | √   |                | √  | 0.1              | 5               | 6               | 30                       |             |                |                 |               |                             |                                                          |                 | 0.013                            | 0.991          |
| 10  | √   |     |                | √   |                | √  | 0.3              | 5               | 6               | 30                       |             |                |                 |               |                             |                                                          |                 | 0.025                            | 0.993          |
| 11  | √   |     |                | √   |                | √  | 0.5              | 5               | 6               | 30                       |             |                |                 |               |                             |                                                          |                 | 0.082                            | 0.991          |
| 12  | √   |     |                | √   |                | √  | 0.7              | 5               | 6               | 30                       |             |                |                 |               |                             |                                                          |                 | 0.091                            | 0.968          |
| 13  | √   |     |                | √   |                | √  | 0.5              | 5               | 3               | 30                       |             |                |                 |               |                             |                                                          |                 | 0.084                            | 0.986          |
| 14  | √   |     |                | √   |                | √  | 0.5              | 5               | 6               | 30                       |             |                |                 |               |                             |                                                          |                 | 0.082                            | 0.991          |
| 15  | √   |     |                | √   |                | √  | 0.5              | 5               | 7               | 30                       |             |                |                 |               |                             |                                                          |                 | 0.080                            | 0.990          |
| 16  | √   |     |                | √   |                | √  | 0.5              | 5               | 10              | 30                       |             |                |                 |               |                             |                                                          |                 | 0.069                            | 0.989          |
| 17  | √   |     |                | √   |                | √  | 0.5              | 10              | 6               | 30                       |             | 0.1            |                 |               |                             |                                                          |                 | 0.058                            | 0.998          |
| 18  | √   |     |                | √   |                | √  | 0.5              | 10              | 6               | 30                       |             |                | 0.1             |               |                             |                                                          |                 | 0.038                            | 0.999          |
| 19  | √   |     |                | √   |                | √  | 0.5              | 10              | 6               | 30                       |             |                |                 | 0.1           |                             |                                                          |                 | 0.028                            | 0.980          |
| 20  | √   |     |                | √   |                | √  | 0.5              | 10              | 6               | 30                       |             |                |                 |               | 0.1                         |                                                          |                 | 0.036                            | 0.989          |
| 21  | √   |     |                | √   |                | √  | 0.5              | 10              | 6               | 30                       |             |                |                 |               |                             | 0.1                                                      |                 | 0.029                            | 0.998          |
| 22  | √   |     |                | √   |                | √  | 0.5              | 10              | 6               | 30                       |             |                |                 |               |                             |                                                          | 0.1             | 0.022                            | 0.990          |

|    |   |   |   |   |     |   |   |    |   |       |       |
|----|---|---|---|---|-----|---|---|----|---|-------|-------|
| 23 | √ |   | √ |   | 0.5 | 5 | 6 | 30 |   | 0.115 | 0.958 |
| 24 | √ |   |   | √ | 0.5 | 5 | 6 | 30 |   | 0.082 | 0.991 |
| 25 | √ |   |   |   | 0.5 | 5 | 6 | 30 | √ | 0.075 | 0.979 |
| 26 |   | √ |   | √ | 0.5 | 5 | 6 | 30 |   | 0.030 | 0.981 |

---

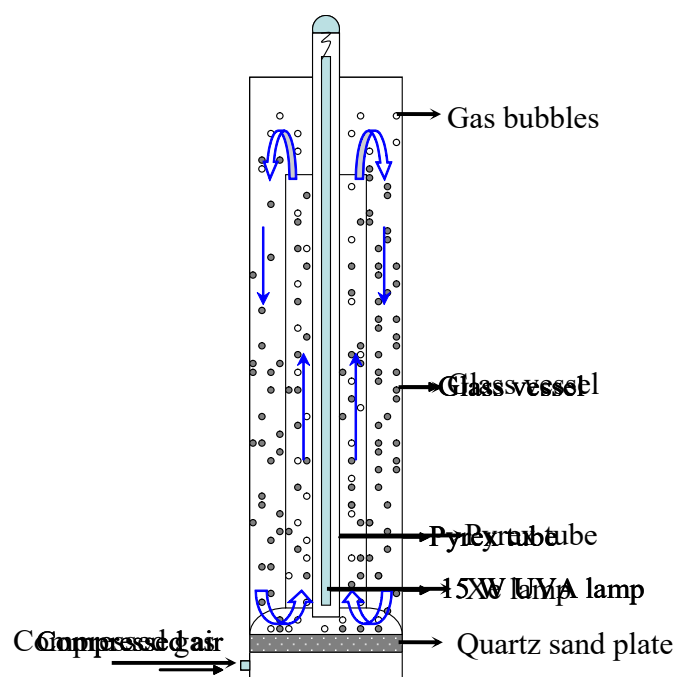

Fig. S1 The experimental set up
